# Supplementary material for: Effect of warm-up protocols using lower and higher loads on multiple-set back squat volume-load
Source: PeerJ. 2024 Jul 9;12:e17347. doi: 10.7717/peerj.17347 (PMC11243969; doi:10.7717/peerj.17347)
Supplement: Supplemental Information 1 [file peerj-12-17347-s001.xlsx]

## Sheet: Baseline
N	DATA	NAME	AGE	WEIGHT (KG)	HEIGHT (CM)	RT EXPERIENCE (YEARS)	1 RM	ATTEMPS	1RM IN RELATION TO WEIGHT
1	2021-06-16	AS1	34	80	1.78	10	84	2	1.05
2	2021-06-23	GS1	24	73.7	1.74	2	124	4	1.6825
3	2021-06-23	MS1	33	95.3	1.66	7	144	4	1.51102
4	2021-06-23	LG1	25	66	1.69	9	88	2	1.33333
5	2021-06-23	DS1	35	84.1	1.73	18	128	3	1.522
6	2021-07-07	MA1	26	112	1.77	10	134	3	1.19643
7	2021-07-30	VN1	23	90	1.77	8	116	2	1.28889
8	2021-08-06	BO1	27	81.5	1.7	16	136	5	1.66871
9	2021-08-09	PL1	27	68.7	1.65	10	96	3	1.39738
10	2021-09-22	AV1	27	59	1.62	5	74	2	1.25424
11	2021-09-22	MF1	28	90	1.75	14	166	4	1.84444
12	2021-09-22	BG1	29	72	1.79	4	90	4	1.25
13	2021-09-29	DF1	24	74	1.75	9	120	3	1.62162
14	2021-10-27	MP1	47	84	1.84	10	86	2	1.02381
15	2021-12-07	RA1	30	78	1.72	3	120	3	1.53846

## Sheet: Plan_SPSS
N	NAME	LOAD (Kg)	HIGH-LOAD (reps)				LOW-LOAD (reps)				CONTROL (reps)				HIGH-LOAD (KG)				LOW-LOAD (KG)				CONTROL (KG)				HIGH-LOAD (PSD)				LOW-LOAD (PSD)				CONTROL (PSD)
			1ª	2ª	3ª	Total	1ª	2ª	3ª	Total	1ª	2ª	3ª	Total	1ª	2ª	3ª	Total	1ª	2ª	3ª	Total	1ª	2ª	3ª	Total	1ª	2ª	3ª	Total	1ª	2ª	3ª	Total	1ª	2ª	3ª	Total
1	AS1	64	9	3	2	14	7	4	2	13	5	3	1	9	576	192	128	896	448	256	128	832	320	192	64	576	4	4	3	11	3	4	4	11	4	4	3	11
2	GS1	93	11	7	3	21	9	4	3	16	8	6	3	17	1023	651	279	1953	837	372	279	1488	744	558	279	1581	3	4	5	12	3	3	4	10	5	6	8	19
3	MS1	108	11	6	4	21	11	6	3	20	9	5	4	18	1188	648	432	2268	1188	648	324	2160	972	540	432	1944	6	7	9	22	7	8	9	24	5	7	9	21
4	LG1	66	15	6	3	24	12	4	3	19	10	5	3	18	990	396	198	1584	792	264	198	1254	660	330	198	1188	7	8	8	23	5	6	6	17	4	6	6	16
5	DS1	96	11	3	2	16	11	3	2	16	9	3	1	13	1056	288	192	1536	1056	288	192	1536	864	288	96	1248	7	7	8	22	6	6	6	18	6	6	6	18
6	MA1	100	11	5	3	19	11	5	4	20	10	5	1	16	1100	500	300	1900	1100	500	400	2000	1000	500	100	1600	4	6	8	18	4	6	6	16	3	6	8	17
7	VN1	86	17	7	3	27	13	3	3	19	14	2	3	19	1462	602	258	2322	1118	258	258	1634	1204	172	258	1634	9	10	10	29	7	9	10	26	7	9	10	26
8	BO1	102	15	8	5	28	17	8	4	29	15	7	3	25	1530	816	510	2856	1734	816	408	2958	1530	714	306	2550	8	9	9	26	7	8	9	24	7	8	9	24
9	PL1	72	8	3	2	13	7	3	3	13	9	4	2	15	576	216	144	936	504	216	216	936	648	288	144	1080	3	3	5	11	1	1	3	5	3	3	3	9
10	AV1	56	7	3	3	13	9	4	4	17	9	5	4	18	392	168	168	728	504	224	224	952	504	280	224	1008	8	9	9	26	8	8	9	25	7	9	9	25
11	MF1	124	13	5	5	23	14	7	5	26	14	8	5	27	1612	620	620	2852	1736	868	620	3224	1736	992	620	3348	5	9	10	24	5	5	9	19	7	8	9	24
12	BG1	68	14	5	3	22	11	8	5	24	12	8	4	24	952	340	204	1496	748	544	340	1632	816	544	272	1632	9	9	10	28	9	10	10	29	8	9	10	27
13	DF1	90	15	8	5	28	11	6	7	24	15	7	8	30	1350	720	450	2520	990	540	630	2160	1350	630	720	2700	7	7	9	23	7	8	9	24	5	6	6	17
14	RA1	90	10	6	3	19	8	4	3	15	8	4	2	14	900	540	270	1710	720	360	270	1350	720	360	180	1260	5	6	6	17	7	9	9	25	5	5	6	16
	MEAN	86.7857	12.0769	5.30769	3.30769	20.5714	11	5	3.69231	19.3571	10.6923	5.23077	3.23077	18.7857	1062.08	473.615	298.692	1834.38	981.154	445.692	324.385	1751.23	949.846	463.692	285.615	1699.15	6.15385	7.07692	7.92308	21.1538	5.53846	6.30769	7.23077	19.0769	5.46154	6.69231	7.38462	19.5385
	SD	19.3279	3.04033	1.88788	1.1094	5.42194	2.73861	1.82574	1.37747	4.90552	3.06552	1.92154	1.92154	5.87149	378.805	219.055	155.787	717.138	415.172	226.262	156.551	739.402	410.346	235.259	198.827	770.506	2.1543	2.2532	2.21591	6.26958	2.29548	2.56205	2.48843	7.15846	1.6641	1.88788	2.39925	5.63642

## Sheet: HIGH-LOAD
N	DATE	NAME	PAP LOAD (90%)	LOAD (75%)	REPS_1	REPS_2	REPS_3	TOTAL	PSE_1	PSE_2	PSE_3	PSD_1	PSD_2	PSD_3	Kcal´s	Protein (g)	Lipid (g)	Carbohydrate (g)
1	2021-07-05	GS1	112	93	11	7	3	21	9.5	10	10	3	4	5	215	9.96	5.87	29.6
2	2021-07-05	LG1	80	66	15	6	3	24	10	10	10	7	8	8	615	30.29	41.7	28.73
3	2021-07-12	DS1	122	96	11	3	2	16	10	10	10	7	7	8	434	26.77	22.91	28.11
4	2021-07-19	MA1	120	100	11	5	3	19	10	10	10	4	6	8	245	4.85	13.17	26.8
5	2021-07-19	MS1	130	108	11	6	4	21	10	10	10	6	7	9
6	2021-08-18	BO1	122	102	15	8	5	28	10	10	10	8	9	9	250	3.2	12.4	32
7	2021-08-25	PL1	86	72	8	3	2	13	10	10	10	3	3	5	542	30.94	27.46	42.72
8	2021-09-15	VN1	104	86	17	7	3	27	10	10	10	9	10	10	193	9.1	9.13	19.21
9	2021-09-27	MF1	150	124	13	5	5	23	10	10	10	5	9	10	595	34.33	31.77	40.43
10	2021-09-27	AS1	76	64	9	3	2	14	10	10	10	4	4	3	536	36.86	26.78	35.52
11	2021-09-27	AV1	66	56	7	3	3	13	10	10	10	8	9	9	338	15.9	15.43	34.29
12	2021-10-27	DF1	108	90	15	8	5	28	10	10	10	7	7	9	137	4.4	1.5	25.95
13	2021-11-03	BG1	80	68	14	5	3	22	10	10	10	9	9	10	117	3.2	3.1	19
14	2021-12-24	RA1	108	90	10	6	3	19	9	10	10	5	6	6

## Sheet: LOW-LOAD
N	DATE	NAME	PAP LOAD(45%)	LOAD (75%)	REPS_1	REPS_2	REPS_3	TOTAL	PSE_1	PSE_2	PSE_3	PSD_1	PSD_2	PSD_3	Kcal´s	Protein (g)	Lipid (g)	Carbohydrate (g)
1	2021-06-28	GS1	56	93	9	4	3	16	9	10	10	3	3	4	502	31.56	27.47	33.2
2	2021-07-07	DS1	58	96	11	3	2	16	10	10	10	6	6	6	433	22.39	10.49	59.66
3	2021-07-12	LG1	40	66	12	4	3	19	10	10	10	5	6	6	568	35.51	46.78	35.4
4	2021-07-12	MS1	65	108	11	6	3	20	10	10	10	7	8	9	353	22.59	17.15	25.68
5	2021-07-26	MA1	60	100	11	5	4	20	9	10	10	4	6	6	331	13.51	20.82	22.19
6	2021-08-11	BO1	62	102	17	8	4	29	10	10	10	7	8	9	489	7.72	25.42	57.96
7	2021-08-13	PL1	42	72	7	3	3	13	9	10	10	1	1	3	224	4.37	5.75	37.41
8	2021-08-18	VN1	52	86	13	3	3	19	10	10	10	7	9	10	491	17.51	14.28	76.21
9	2021-09-15	AS1	38	64	7	4	2	13	10	10	10	3	4	4	536	36.86	26.78	35.52
10	2021-10-20	AV1	34	56	9	4	4	17	10	10	10	8	8	9	311	13.07	13.41	34.96
11	2021-10-20	MF1	74	124	14	7	5	26	10	10	10	5	5	9	123	4.6	1.8	22
12	2021-10-20	BG1	40	68	11	8	5	24	10	10	10	9	10	10	590	5.96	15.75	116.31
13	2021-11-03	DF1	54	90	11	6	7	24	10	10	10	7	8	9	319	5.72	14.52	40.96
14	2021-11-11	MP1	38	64
15	2021-12-11	RA1	54	90	8	4	3		7	9	10	7	9	9

## Sheet: CONTROL
N	DATE	NAME	Load (75%)	REPS_1	REPS_2	REPS_3	TOTAL	PSE_1	PSE_2	PSE_3	PSD_1	PSD_2	PSD_3	Kcal´s	Protein (g)	Lipid (g)	Carbohydrate (g)
1	2021-06-28	DS1	96	9	3	1	13	10	10	10	6	6	6	412	30.26	20.52	25.36
2	2021-07-05	MS1	108	9	5	4	18	10	10	10	5	7	9	431	24.1	14.62	50.74
3	2021-07-12	MA1	100	10	5	1	16	10	10	10	3	6	8	335	8.04	13.76	47.8
4	2021-07-14	GS1	93	8	6	3	17	9.5	10	10	5	6	8
5	2021-07-19	LG1	66	10	5	3	18	10	10	10	4	6	6	726	35.42	42.31	81.63
6	2021-08-18	PL1	72	9	4	2	15	10	10	10	3	3	3	448	16.2	3.3	87.67
7	2021-08-25	BO1	102	15	7	3	25	10	10	10	7	8	9	0	0	0	0
8	2021-09-01	VN1	86	14	2	3	19	10	10	10	7	9	10
9	2021-09-20	AS1	64	5	3	1	9	10	10	10	4	4	3	515	37.06	26.78	30.52
10	2021-09-29	BG1	68	12	8	4	24	10	10	10	8	9	10
11	2021-10-04	AV1	56	9	5	4	18	10	10	10	7	9	9	338	15.9	15.43	34.29
12	2021-10-04	MF1	124	14	8	5	27	10	10	10	7	8	9	225	4.72	13.32	22.01
13	2021-10-20	DF1	90	15	7	8	30	10	10	10	5	6	6	374	11.3	20.32	37.35
14	2021-12-15	RA1	90	8	4	2	14	8	8	9	5	5	6
